# Supplementary material
Source: Elsevier journal article supplement (https://www.sciencedirect.com/science/article/pii/S1885585717300865)

|                                |      |           |        |      |           |      |      |           |      |
|--------------------------------|------|-----------|--------|------|-----------|------|------|-----------|------|
| Diabetes mellitus              | 1.33 | 1.08-1.64 | .007   | 1.40 | 1.05-1.85 | .02  | –    | –         | –    |
| ACE inhibitor or ARB treatment | 0.69 | 0.50-0.95 | .03    | –    | –         | –    | 0.61 | 0.38-1.00 | .05  |
| Beta-blocker treatment         | 0.70 | 0.51-0.97 | .03    | –    | –         | –    | –    | –         | –    |
| Sodium                         | –    | –         | –      | 0.93 | 0.89-0.98 | .003 | 0.94 | 0.89-0.99 | .01  |
| Hemoglobin                     | 0.93 | 0.88-0.99 | .03    | –    | –         | –    | –    | –         | –    |
| NT-proBNP <sup>b</sup>         | 1.31 | 1.15-1.50 | < .001 | 1.32 | 1.11-1.57 | .002 | 1.32 | 1.10-1.57 | .003 |
| hs-CRP                         | –    | –         | –      | –    | –         | –    | –    | –         | –    |
| ST2 <sup>d</sup>               | 1.20 | 1.08-1.33 | .001   | 1.17 | 1.00-1.36 | .05  | –    | –         | –    |
| A $\beta$ 40 <sup>c</sup>      | 1.21 | 1.08-1.35 | .001   | 1.17 | 1.01-1.35 | .04  | 1.13 | 0.93-1.37 | .22  |

95%CI, 95% confidence interval; A $\beta$ 40: amyloid-beta 1-40 peptide; ACE inhibitor: angiotensin-converting enzyme inhibitor; ARB, angiotensin receptor blocker; eGFR, estimated glomerular filtration rate (Chronic Kidney Disease Epidemiology Collaboration formula equation); HF: heart failure; HR, hazard ratio; hs-CRP, high-sensitivity C-reactive protein; LVEF, left ventricular ejection fraction; NYHA, New York Heart Association; NT-proBNP: N-terminal pro-B-type natriuretic peptide; ST2, soluble suppression of tumorigenicity-2.

<sup>a</sup>N = 678.

<sup>b</sup>n = 678.

<sup>c</sup>NT-proBNP, hs-CRP and A $\beta$ 40 as log (NT-proBNP), log (hs-CRP) and log(A $\beta$ 40), per 1 standard deviation.

<sup>d</sup>ST2 per every 10 mL; *P* value for the quadratic form of ST2 = .01 for all-cause death and *P* = .06 for cardiovascular death.

**Table 2 of the supplementary material**

Measurements of Performance of the Models For All-cause, Cardiovascular and Heart Failure-Related Death at 5 Years. A Competitive Risk Method Was Used for Cardiovascular Death and HF-Related Death

|                               | All-cause death    |                           | Cardiovascular death |                           | HF-related death   |                           |
|-------------------------------|--------------------|---------------------------|----------------------|---------------------------|--------------------|---------------------------|
|                               | Reference          | Model with                | Reference            | Model with                | Reference          | Model with                |
|                               | Model <sup>a</sup> | A $\beta$ 40 <sup>b</sup> | Model <sup>a</sup>   | A $\beta$ 40 <sup>b</sup> | Model <sup>a</sup> | A $\beta$ 40 <sup>b</sup> |
| <i>Discrimination</i>         |                    |                           |                      |                           |                    |                           |
| C-statistic <sup>d</sup>      | 0.742              | 0.753                     |                      |                           |                    |                           |
|                               | (0.720-0.775)      | (0.729-0.778)             |                      |                           |                    |                           |
|                               | Reference          | $P = .15^c$               |                      |                           |                    |                           |
| AUC                           | 0.806              | 0.811                     | 0.755                | 0.762                     | 0.755              | 0.761                     |
|                               | (0.776-0.836)      | (0.782-0.841)             | (0.716-793)          | (0.724-0.800)             | (0.707-0.802)      | (0.714-0.808)             |
|                               | Reference          | $P = .20^c$               | Reference            | $P = .12^c$               | Reference          | $P = .23^c$               |
|                               |                    |                           |                      |                           |                    |                           |
| <i>Calibration</i>            |                    |                           |                      |                           |                    |                           |
| H-L                           | Chi-square: 6.67   | Chi-square: 7.80          | Chi-square: 5.0      | Chi-square: 3.96          | Chi-square: 10.32  | Chi-square: 4.30          |
|                               | $P = .25$          | $P = .17$                 | $P = .42$            | $P = .56$                 | $P = .07$          | $P = .51$                 |
| Brier score                   | 0.1181             | 0.1168                    | 0.0922               | 0.0913                    | 0.0530             | 0.0529                    |
| AIC                           | 5395               | 5382                      | 3023                 | 3018                      | 1580               | 1580                      |
| BIC                           | 5428               | 5419                      | 3051                 | 3052                      | 1599               | 1604                      |
| Likelihood ratio <sup>f</sup> | Reference          | $P < .001^c$              | Reference            | $P = .02^c$               | Reference          | $P = .22^c$               |
| <i>Reclassification</i>       |                    |                           |                      |                           |                    |                           |
| NRI, %                        | Reference          | 34.3 (22.1; 48.8)         | Reference            | 28.8 (13.5;44.9)          | Reference          | 29.0 (7.6; 49.8)          |
|                               |                    | $P = .001^c$              |                      | $P < .001^c$              |                    | $P = .01^c$               |

A $\beta$ 40, amyloid-beta 1-40 peptide; ACE inhibitor, angiotensin-converting enzyme inhibitor; AIC, Akaike information criterion; ARB, angiotensin receptor blocker; AUC, area under the curve; BIC, Bayesian information criterion; eGFR, estimated glomerular filtration rate (Chronic Kidney Disease Epidemiology Collaboration formula equation); HF: heart failure; H-L, Hosmer-Lemeshow test; HR, hazard ratio; LVEF, left ventricular ejection fraction; NYHA, New York Heart Association; NRI, net reclassification improvement; NT-proBNP, N-terminal pro-B-type natriuretic peptide.

<sup>a</sup>Reference model: age, sex, NYHA functional class, LVEF, ischemic etiology, diabetes, eGFR, hemoglobin, sodium, beta-blocker treatment, ACE inhibitor or ARB treatment, and NT-proBNP.

<sup>b</sup>Model with A $\beta$ 40: Reference model + A $\beta$ 40

<sup>c</sup>*P* values vs reference model.

<sup>d</sup>Uses the index of rank correlation, Somers Dxy, which already incorporates information of censored data.

<sup>e</sup>Uses the D'Agostino-Nam version of the Hosmer-Lemeshow calibration test.

<sup>f</sup>Used as an expression of global goodness of fit; a significant *P* value in this test means that adding a new variable to the model significantly improves the accuracy of the reference model.

### Table 3 of the supplementary material

Clinical Characteristics and Treatment Relative to Period Inclusion (2006-2009 vs 2010-2013)

|                          | 2006-2009     | 2010-2013   | <i>P</i> |
|--------------------------|---------------|-------------|----------|
|                          | N = 643       | N = 296     |          |
| <i>Age, y</i>            | 66.0 ± 12.8   | 65.9 ± 12.2 | .95      |
| <i>Male sex</i>          | 464 (72.2)    | 218 (73.6)  | .64      |
| <i>Caucasian</i>         | 637 (99.1)    | 294 (99.3)  | .63      |
| <i>Ischemic etiology</i> | 336 (52.2)    | 139 (47.0)  | .13      |
| <i>HF duration, mo</i>   | 26.7 [4.8–72] | 10 [2–55.5] | < .001   |
| <i>LVEF, %</i>           | 33.3 ± 13.2   | 33.7 ± 13.2 | .67      |
| <i>HFpEF (LVEF ≥ 50)</i> | 82 (12.8)     | 37 (12.5)   | .91      |
| <i>NYHA class III-IV</i> | 164 (25.5)    | 49 (16.6)   | .002     |
| <i>Diabetes</i>          | 231 (35.9)    | 111 (37.5)  | .64      |
| <i>Hypertension</i>      | 401 (62.3)    | 193 (65.2)  | .40      |
| <i>Anemi<sup>a</sup></i> | 297 (46.4)    | 129 (45.2)  | .75      |

|                                          |                  |                    |        |
|------------------------------------------|------------------|--------------------|--------|
| <i>Renal insufficiency<sup>b,c</sup></i> | 404 (62.8)       | 148 (50)           | < .001 |
| <i>Atrial fibrillation</i>               | 133 (20.7)       | 76 (25.9)          | .08    |
| <i>Cognitive impairment<sup>f</sup></i>  | 18 (3.2)         | 5 (2.1)            | .44    |
| <i>BMI, Kg/m<sup>2,c</sup></i>           | 27.9 ± 5.2       | 27.2 ± 5.6         | .07    |
| <i>eGFR, mL/min/1.73m<sup>2</sup></i>    | 53.3 ± 26.2      | 59.6 ± 27.6        | < .001 |
| <i>Na, mmol/L<sup>c</sup></i>            | 139.1 ± 3.4      | 138.1 ± 3.7        | < .001 |
| <i>Hemoglobin, g/dL<sup>c</sup></i>      | 12.9 ± 1.9       | 12.9 ± 1.9         | .79    |
| <i>NT-proBNP, ng/L<sup>d</sup></i>       | 1180 [491–2726]  | 1487 [698–3817]    | .001   |
| <i>Neprilysin, ng/mL</i>                 | 0.65 [0.42–1.11] | 0.63 [0.36–1.29]   | .035   |
| <i>hs-CRP<sup>e</sup></i>                | 3.74 [1.42–8.92] | 2.65 [1.05–6.7]    | .20    |
| <i>ST2<sup>g</sup></i>                   | 39.5 [31.2–51.2] | 33.7 [28.7–41.5.9] | .007   |
| <i>Treatment</i>                         |                  |                    |        |
| ACE inhibitor or ARB                     | 590 (91.8)       | 240 (81.1)         | < .001 |
| Beta-blocker                             | 578 (90)         | 267 (90.2)         | .88    |
| MRA                                      | 377 (58.6)       | 175 (59.1)         | .89    |
| Loop diuretic                            | 596 (92.7)       | 254 (85.8)         | <.001  |

|            |            |            |       |
|------------|------------|------------|-------|
| Digoxin    | 277 (43.1) | 22 (26)    | <.001 |
| Ivabradine | 44 (6.8)   | 54 (18.2)  | <.001 |
| Statins    | 491 (76.3) | 211 (71.3) | .10   |
| CRT        | 51 (7.9)   | 30 (10.1)  | .26   |
| ICD        | 82 (12.8)  | 46 (15.5)  | .25   |

A $\beta$ 40, amyloid-beta 1-40 peptide; ACE inhibitor, angiotensin-converting enzyme inhibitor; ARB, angiotensin receptor blocker; BMI, body mass index; CRT, cardiac resynchronization therapy; eGFR, estimated glomerular filtration rate (Chronic Kidney Disease Epidemiology Collaboration formula equation); HF, heart failure; HFpEF, heart failure with preserved ejection fraction; hs-CRP, high-sensitivity C-reactive protein; ICD, implantable cardioverter-defibrillator; LBBB, left bundle branch block. LVEF, left ventricular ejection fraction; MRA, mineralcorticoid receptor antagonist; NYHA, New York Heart Association; NT-proBNP, N-terminal pro-B-type natriuretic peptide.

Data are expressed as mean  $\pm$  standard deviation, median [interquartile range] or n (%).

<sup>a</sup>World Health Organization criteria (< 13 g/dL in men and < 12 g/dL in women).

<sup>b</sup>eGFR < 60 mL/min/1.73 m<sup>2</sup>.

<sup>c</sup>n = 925.

<sup>d</sup>n = 903;

<sup>e</sup>n = 649;



$$^f_n = 802.$$

$$^g_n = 686.$$

**Table 4 of the supplementary material**

Multivariable Cox Regression Analysis for Risk of All-cause, Cardiovascular and Heart Failure-related Death in Patients With Left Ventricular Ejection Fraction < 50%. A Competitive Risk Method Was Used for Cardiovascular Death and HF-related Death

|                                  | All-cause death |           |          | Cardiovascular Death |           |          | HF-related death |           |          |
|----------------------------------|-----------------|-----------|----------|----------------------|-----------|----------|------------------|-----------|----------|
|                                  | HR              | 95%CI     | <i>P</i> | HR                   | 95%CI     | <i>P</i> | HR               | 95%CI     | <i>P</i> |
| Age                              | 1.05            | 1.03-1.06 | <.001    | 1.04                 | 1.02-1.05 | <.001    | 1.04             | 1.02-1.06 | <.001    |
| Female sex                       | 0.65            | 0.51-0.84 | <.001    | 0.69                 | 0.48-0.98 | .04      | –                | –         | –        |
| Ischemic etiology of HF          | –               | –         | –        | –                    | –         | –        | –                | –         | –        |
| LVEF                             | –               | –         | –        | –                    | –         | –        | –                | –         | –        |
| NYHA functional class            | 1.80            | 1.47-2.22 | <.001    | 1.37                 | 1.02-1.85 | .04      | –                | –         | –        |
| eGFR, mL/min/1.73 m <sup>2</sup> | –               | –         | –        |                      |           |          | –                | –         | –        |
| Diabetes mellitus                | 1.32            | 1.07-1.62 | .009     | 1.45                 | 1.08-1.95 | .01      | 1.75             | 1.17-2.63 | .007     |
| ACE inhibitor or ARB treatment   | 0.57            | 0.41-0.78 | .001     | –                    | –         | –        | –                | –         | –        |
| Beta-blocker treatment           | 0.50            | 0.36-0.70 | <.001    | –                    | –         | –        | –                | –         | –        |
| Sodium                           | –               | –         | –        | 0.95                 | 0.91-1.00 | .03      | –                | –         | –        |

|               |      |           |       |      |           |       |      |           |       |
|---------------|------|-----------|-------|------|-----------|-------|------|-----------|-------|
| Hemoglobin    | 0.93 | 0.87-0.99 | .02   | –    | –         | –     | 1.15 | 1.02-1.29 | .022  |
| NT-proBNP*    | 1.34 | 1.18-1.52 | <.001 | 1.50 | 1.26-1.78 | <.001 | 1.65 | 1.32-2.06 | <.001 |
| A $\beta$ 40* | 1.24 | 1.11-1.38 | <.001 | 1.11 | 0.95-1.28 | .19   | 1.08 | 0.88-1.34 | .46   |

95%CI, 95% confidence interval; A $\beta$ 40, amyloid-beta 1-40 peptide; ACE inhibitor, angiotensin-converting enzyme inhibitor; ARB, angiotensin receptor blocker; eGFR, estimated glomerular filtration rate (Chronic Kidney Disease Epidemiology Collaboration formula equation); HF, heart failure; HR, hazard ratio; LVEF, left ventricular ejection fraction; NYHA, New York Heart Association; NT-proBNP, N-terminal pro-B-type natriuretic peptide.

\*NT-proBNP and A $\beta$ 40 as log (NT-proBNP) and log (A $\beta$ 40), per 1 standard deviation.

**Table 5 of the supplementary material.**

Multivariable Cox Regression Analysis for Risk of All-cause, Cardiovascular and Heart Failure-related Death Including Inflammation Biomarkers (hs-CRP and ST2)<sup>a</sup> In Patients With Left Ventricular Ejection Fraction < 50%. A Competitive Risk Method Was Used For Cardiovascular Death and Heart-failure Related Death

|                                  | All-cause death |           |          | Cardiovascular Death |           |          | HF-related death |           |          |
|----------------------------------|-----------------|-----------|----------|----------------------|-----------|----------|------------------|-----------|----------|
|                                  | HR              | 95%CI     | <i>P</i> | HR                   | 95%CI     | <i>P</i> | HR               | 95%CI     | <i>P</i> |
| Age                              | 1.04            | 1.03-1.06 | <.001    | 1.04                 | 1.02-1.05 | <.001    | 1.04             | 1.02-1.06 | <.001    |
| Female                           | 0.68            | 0.52-0.89 | .005     | 0.69                 | 0.48-0.98 | .04      | –                | –         | –        |
| Ischemic etiology of HF          | –               | –         | –        | –                    | –         | –        | –                | –         | –        |
| LVEF                             | –               | –         | –        | –                    | –         | –        | –                | –         | –        |
| NYHA functional class            | 1.65            | 1.31-2.08 | <.001    | --                   | --        | --       | –                | –         | –        |
| eGFR, mL/min/1.73 m <sup>2</sup> | –               | –         | –        | –                    | –         | –        | –                | –         | –        |
| Diabetes mellitus                | 1.38            | 1.10-1.73 | .006     | 1.45                 | 1.08-1.95 | .01      | 1.75             | 1.17-2.63 | .007     |
| ACE inhibitor or ARB treatment   | 0.67            | 0.45-1.00 | .048     | –                    | –         | –        | –                | –         | –        |
| Beta-blocker treatment           | 0.57            | 0.39-0.84 | .004     | –                    | –         | –        | –                | –         | –        |

|                           |      |           |      |      |           |       |      |           |       |
|---------------------------|------|-----------|------|------|-----------|-------|------|-----------|-------|
| Sodium                    | –    | –         | –    | 0.95 | 0.91-0.99 | .03   | –    | –         | –     |
| Hemoglobin                | 0.91 | 0.85-0.98 | .008 | –    | –         | –     | 1.15 | 1.02-1.29 | .02   |
| NT-proBNP <sup>b</sup>    | 1.30 | 1.12-1.50 | .001 | 1.56 | 1.31-1.85 | <.001 | 1.65 | 1.32-2.06 | <.001 |
| hs-CRP                    | –    | –         | –    | –    | –         | –     | –    | –         | –     |
| ST2 <sup>c</sup>          | 1.05 | 1.01-1.10 | .02  | –    | –         | –     | –    | –         | –     |
| A $\beta$ 40 <sup>b</sup> | 1.24 | 1.10-1.40 | .001 | 1.11 | 0.96-1.29 | .17   | 1.08 | 0.88-1.34 | .46   |

95%CI, 95%confidence interval; A $\beta$ 40, amyloid-beta 1-40 peptide; ACE inhibitor, angiotensin-converting enzyme inhibitor; ARB, angiotensin receptor

blocker; eGFR, estimated glomerular filtration rate (Chronic Kidney Disease Epidemiology Collaboration formula equation); HF, heart failure; HR, hazard ratio; hs-CRP, high-sensitivity C-reactive protein; LVEF, left ventricular ejection fraction; NYHA, New York Heart Association; NT-proBNP, N-terminal pro-brain natriuretic peptide; ST2, soluble suppression of tumorigenicity-2.

<sup>a</sup>N = 567.

<sup>b</sup>NT-proBNP, hs-CRP and A $\beta$ 40 as log (NT-proBNP), log (hs-CRP) and log (A $\beta$ 40), per 1 standard deviation.

<sup>c</sup>ST2, per every 10 mL; *P* value for the quadratic form of ST2 = .207.

**Figure of the supplementary material.** Survival curves relative to median blood A $\beta$ 40 concentration in patients with left ventricular ejection fraction < 50%. A: Kaplan-Meier survival curves for all-cause death. B: cumulative incidence of cardiovascular death, taking into account other causes of noncardiovascular of death as competitive risk event. C: cumulative incidence of heart failure-related death, taking into account other cardiovascular and noncardiovascular causes of death as competitive risk event. A $\beta$ 40, amyloid-beta 1-40 peptide; HR, hazard ratio.

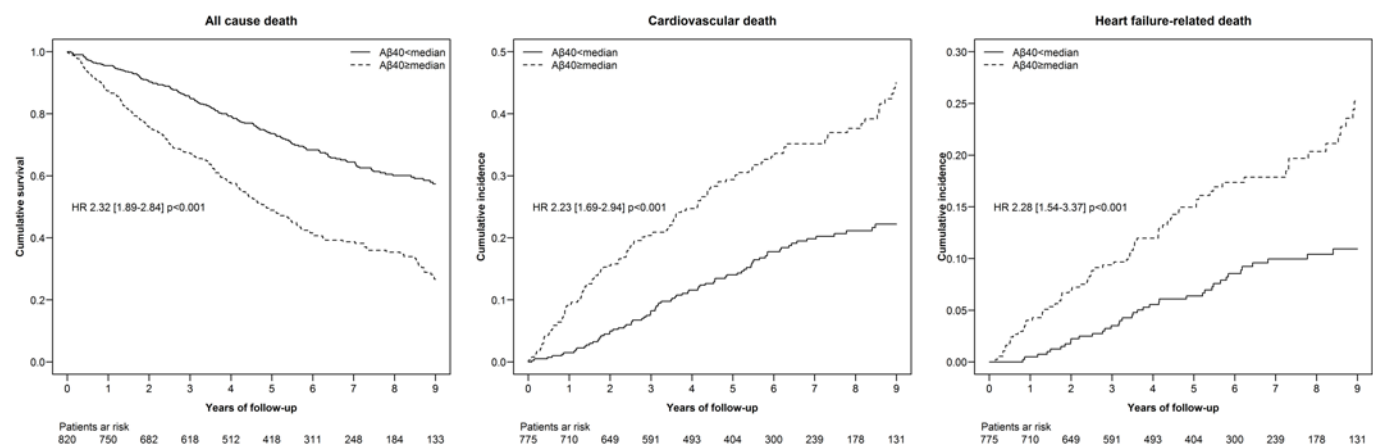

Supplement: mmc1 [file S1885585717300865:mmc1.pdf]
